# Supplementary material for: Frailty and invasive mechanical ventilation: association with outcomes, extubation failure, and tracheostomy
Source: Springer Nature journal article supplement (doi:10.1007/s00134-019-05795-8), 2019-10-08
Supplement: MOESM7 [file 17250654]

**Supplemental Table 5**: Multivariable Logistic Regression Model for Mortality following removal of patients with existing “No CPR” directive at the time of ICU admission, “No-Reintubation” directive at the time of extubation, and patients extubated to facilitate palliation. Total number of patients included = 6,076. Nagelkerke *r2* = 0.63. Hosmer-Lemeshow = 0.44.

| **Variable** | **Odds Ratio** | **95% CI** | ***P Value*** |
| --- | --- | --- | --- |
| **Age** | 1.02 | 1.01-1.02 | <0.001 |
| **Male Gender** | 0.94 | 0.85-1.06 | 0.11 |
| **Frailty (CFS ≥ 5)** | 1.16 | 1.05-1.31 | <0.001 |
| **MODS** | 1.16 | 1.12-1.22 | <0.001 |
| **Elixhauser Comorbidity Score** | 1.01 | 1.01-1.02 | <0.01 |
| **Setting of Intubation** |  |  |  |
| ICU | Ref |  |  |
| Outside ICU | 0.95 | 0.81-1.09 | 0.45 |
| **Most Responsible Diagnosis** |  |  |  |
| Other | Ref |  |  |
| Infection/Sepsis | 0.87 | 0.76-1.04 | 0.37 |
| Respiratory Failure | 1.41 | 1.20-1.66 | <0.001 |
| Trauma | 0.94 | 0.74-1.10 | 0.14 |
| Malignancy | 1.06 | 0.89-1.31 | 0.72 |
| Spontaneous Intracranial Hemorrhage | 1.84 | 1.43-2.37 | <0.001 |
| Stroke | 1.54 | 1.23-1.98 | <0.001 |
| Overdose/Poisoning | 0.46 | 0.36-0.68 | <0.001 |
| Renal Failure | 0.41 | 0.25-0.59 | <0.001 |
| Gastrointestinal Bleeding | 1.13 | 0.73-1.70 | 0.51 |
| Congestive Heart Failure | 1.04 | 0.68-1.61 | 0.90 |
| Cardiac Arrest | 1.81 | 1.50-2.16 | <0.001 |
| Seizures/Status Epilepticus | 0.65 | 0.42-0.99 | 0.04 |
| Diabetic Ketoacidosis | 0.62 | 0.37-1.04 | 0.09 |
